# Supplementary material for: Chelonia mydas fibropapillomatosis in Baie Blanche, Tintamarre Island Saint Martin (FWI), an environmental sciences and veterinary cross-analysis
Source: Research Square preprint supplement (doi:10.21203/rs.3.rs-876743/v1), 2021-09-10
Supplement: Supplementary file 1 [file 213a146ea415c9835dcb2261.xlsx]

## Sheet: Sheet 1 - deviation). Stations 
Station\values	δ15N (‰)	N (%)	P (%)
Tintamarre	1,47 ± 1,15	0,64 ± 0,22	0,11 ± 0,09
